# Supplementary material
Source: publisher figshare collection journal article supplement (https://karger.figshare.com/ndownloader/files/27775254)
Supplement: Supplementary file 1 [file 27775254]

**Supplementary Table 1: Comparison of patient demographics and baseline characteristics between patients with included (prolactin level >10,000 mU/L) and excluded (prolactin level <10,000 mU/L) prolactin secreting tumours**

*P value calculated using Mann-Whitney U test.* For *differences in patient gender and Knosp grade, p value determined using Fisher’s exact test (*).*

| **Demographic/ biochemical**  **parameter** | | **Prolactin >10,000 mU/L**  **(N=16)** | | **Prolactin <10,000 mU/L**  **(N=12)** | |  | **P value** |
| --- | --- | --- | --- | --- | --- | --- | --- |
| **Median age, yrs** **(IQR)** | | 44.1  (32-56) | | 36.9  (26-51) | |  | <0.001 |
| **Sex, N** | **Male** | 11 | | 6 | |  | 0.27* |
| **Female** | 5 | | 6 | |
| **Median tumour size cm3**  **(IQR)** | | 7.96  (3.1-17.2) | | 0.32  (0.2-3.2) | |  | <0.001 |
| **Knosp**  **Grade, N** | | *0* | 0 | *0* | 5 |  | <0.001* |
| *I* | 1 | *I* | 4 |
| *II* | 5 | *II* | 2 |
| *III* | 1 | *III* | 1 |
| *IV* | 9 | *IV* | 0 |
| **Median serum prolactin mU/L (IQR)** | | 30461  (17400-90000) | | 2328  (1925-4107) | |  | <0.001 |
